# Supplementary material for: Highly selective hydrogenation of furfural to furfuryl alcohol over Pt nanoparticles supported on g-C3N4 nanosheets catalysts in water
Source: PubMed Central journal article supplement (PMC4916514; doi:10.1038/srep28558), 2016-06-22
Supplement: srep28558-s1.pdf [file srep28558-s1.pdf]

## **Electronic Supplementary Information**

### **Highly selective hydrogenation of furfural to furfuryl alcohol over Pt nanoparticles supported on g-C<sub>3</sub>N<sub>4</sub> nanosheets catalysts in water**

Xiufang Chen\*, Ligang Zhang, Bo Zhang, Xingcui Guo, Xindong Mu\*

Key Laboratory of Bio-based Materials, Qingdao Institute of Bioenergy and  
Bioprocess Technology, Chinese Academy of Sciences, Qingdao 266101, China

\* Correspondence and requests for materials should be addressed to X.C. (email: chenxf@qibebt.ac.cn) or X.M. (email: muxd@qibebt.ac.cn)

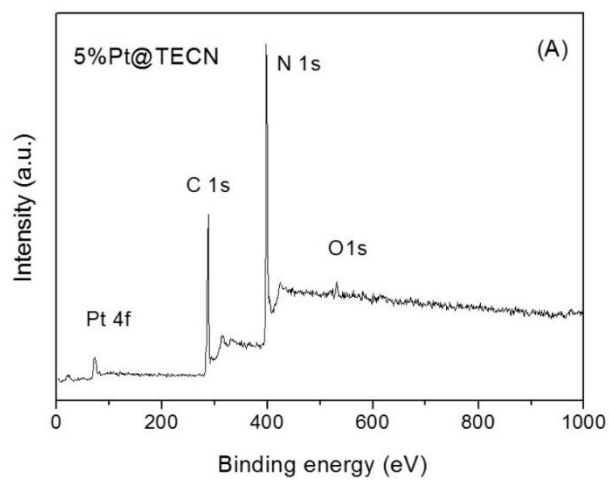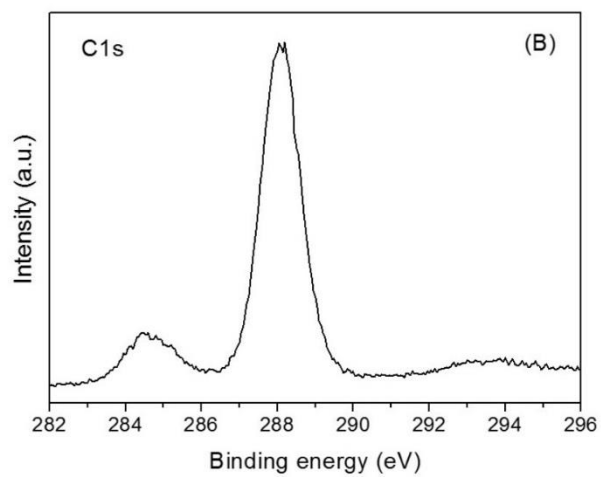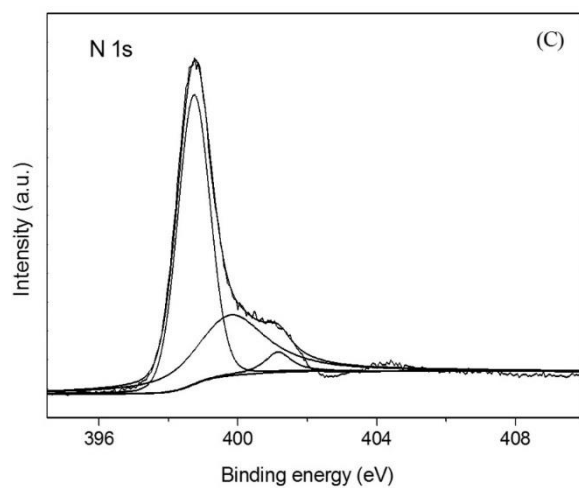

**Figure S1** (A) XPS survey spectrum of 5%Pt@TECN catalyst, XPS spectra of (B) C1s, (C) N 1s.

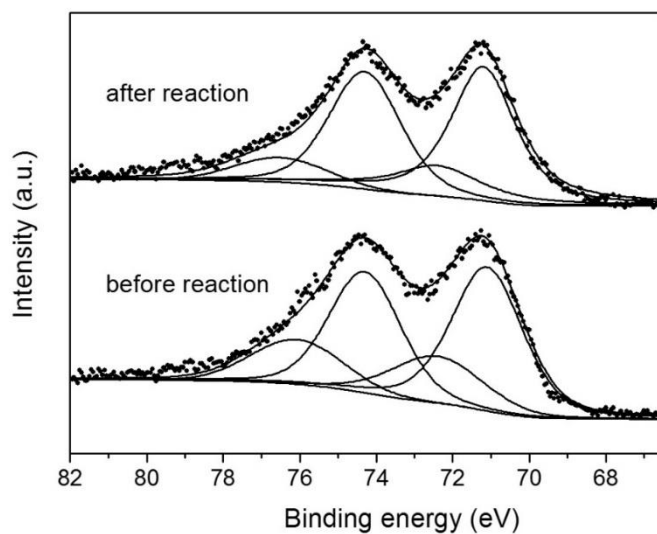

**Figure S2.** XPS spectra in the Pt 4f region of fresh and spent 5% Pt@TECN catalysts.

**Table S1.** Furfural hydrogenation over Pt catalysts after 1 h reaction in aqueous phase at 100 °C.

| Entry | Catalyst   | Conv. (%) | Furfuryl alcohol Sel. (%) |
|-------|------------|-----------|---------------------------|
| 1     | 5% Pt@TECN | 90.3      | >99                       |
| 2     | 5% Pt@C    | 51.1      | >99                       |

Reaction conditions: Pt catalyst (0.24 mol% Pt relative to substrate), 20 mL H<sub>2</sub>O, 0.4 mL furfural, 1.0 MPa H<sub>2</sub>, 100 °C, 1 h.

**Gas-chromatographic analysis of the reaction mixture from Table 1, entry 7 and Table 2, entry 1.**

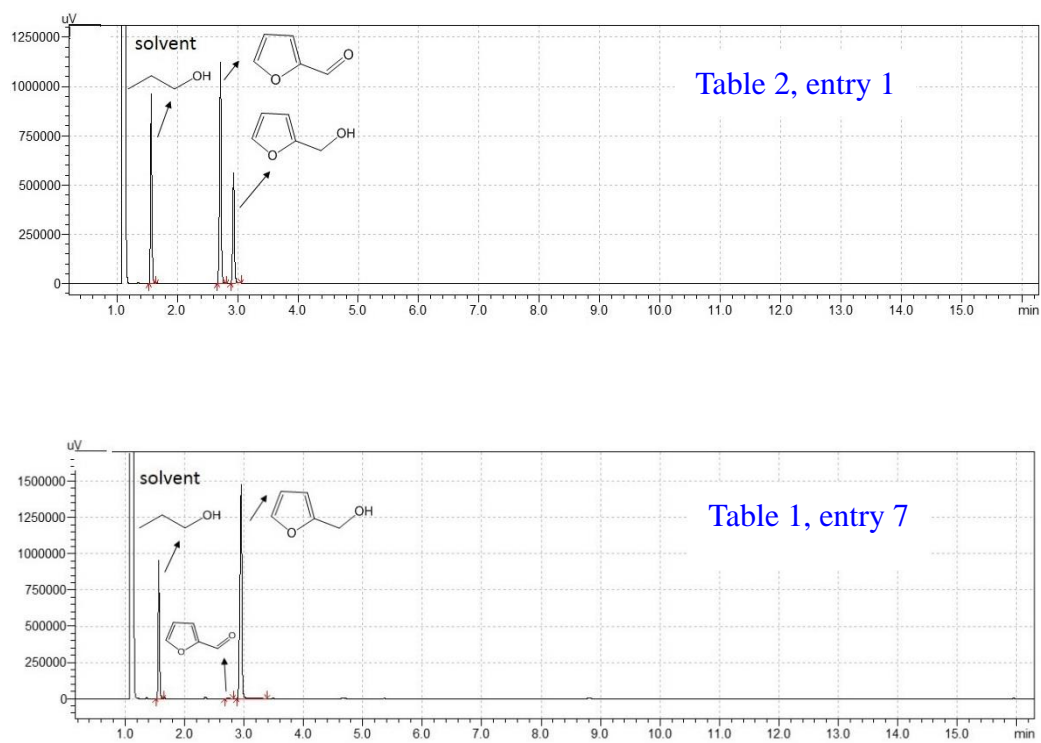

**Figure S3.** Representative GC spectrums of furfural hydrogenation in water.

### NMR analysis of the reaction mixture from Table 1, entry 7.

The reaction mixture was obtained by furfural hydrogenation over 5%Pt@TECN under 1MPa H<sub>2</sub> for 5 h in water (Table 1, entry 7). Then the reaction mixture was extracted with EtOAc, the organics were dried (Na<sub>2</sub>SO<sub>4</sub>), concentrated and analysed by NMR. The NMR analysis (see figure S4) confirmed that the main product of the reaction was furfuryl alcohol.

<sup>1</sup>H NMR (600 MHz, CDCl<sub>3</sub>) δ 7.36 (d, 1H), 6.30 (t, 1.08H), 6.24 (d, 1.06H), 4.51 (d, 2.1H), 3.22 (br s, 0.98H).

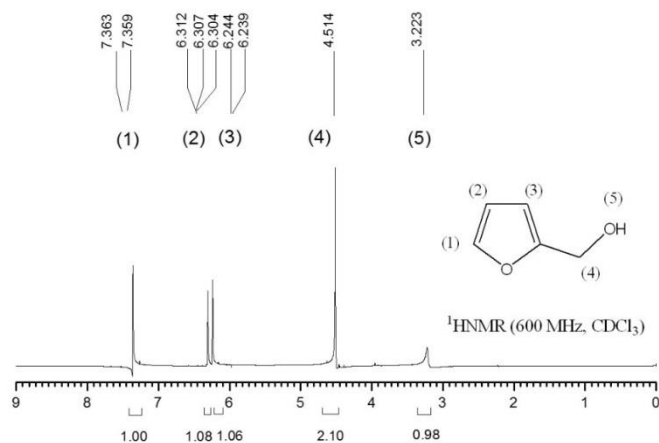

**Figure S4.** The <sup>1</sup>H NMR spectra of the reaction mixture.

## Quantitative GC analyses

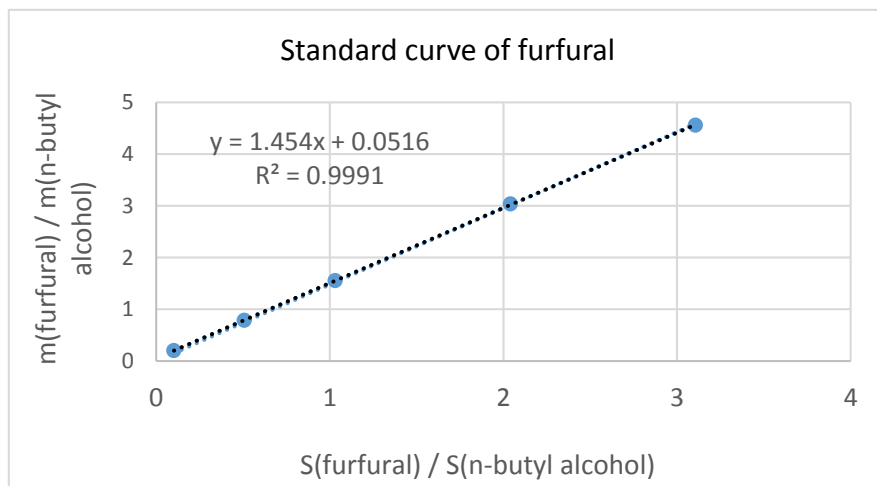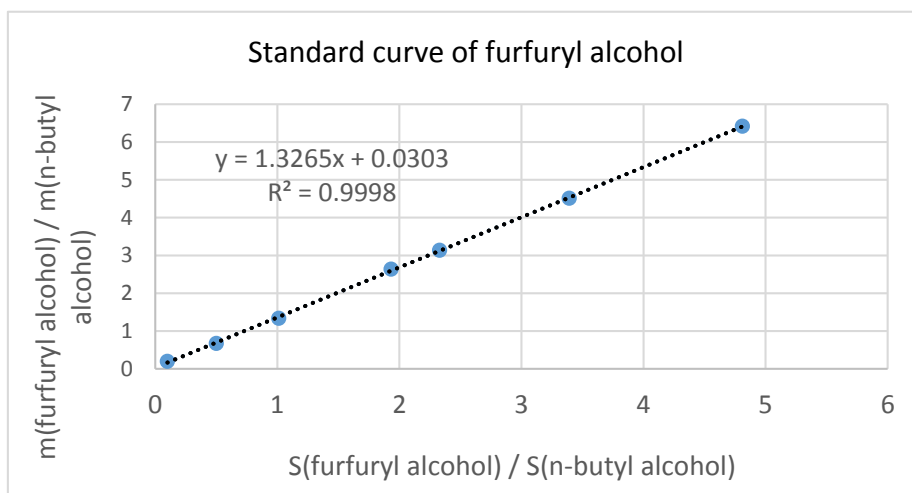

**Figure S5.** Standard curve of furfural with n-butyl alcohol and furfuryl alcohol with n-butyl alcohol.
